# Supplementary material
Source: PubMed Central journal article supplement (PMC1790907)
Supplement: NIHMS5617-supplement-Suipplem.pdf [file NIHMS5617-supplement-Suipplem.pdf]

**Supplementary Figure 1: Tgt inhibits transcription by the *E. coli* and *T. thermophilus* RNAPs similarly.**

To ascertain that the structural data obtained with the *T. thermophilus* RNAP/Tgt complex would be applicable to other bacterial enzymes, we compared inhibition of the *E. coli* and *T. thermophilus* RNAPs by Tgt (**Supplementary Fig. 1**) using a promoter-specific assay with the  $\lambda P_R$  promoter, which is utilized efficiently by both enzymes. Tgt inhibited transcription by the *E. coli* and *T. thermophilus* RNAPs similarly when added either during initiation or elongation: the apparent  $IC_{50}$  was only  $\sim$  two-fold higher for the *Thermus* enzyme, and the sites at which Tgt induced pausing/arrest during elongation were similar but not identical (**Supplementary Fig. 1b**). Consistent with the report of Matthews and Durbin<sup>1</sup>, Tgt did not affect the open complex formation or stability (data not shown).

During elongation, the differences between the enzymes could be due to the differential recognition of the regulatory signals. We have demonstrated that the *B. subtilis* RNAP recognizes only a subset of signals that induce the *E. coli* RNAP to pause, and fails to pause at hairpin-dependent sites<sup>2</sup>. Interestingly, *T. thermophilus* RNAP also did not recognize the *his* pause site during elongation at either 37 °C (Fig. 1B) or 55 °C (data not shown). As noted for the inhibition of RNAP III transcription<sup>3</sup>, Tgt action was site-specific, and the sites at which Tgt effect was particularly pronounced were mapped to pyrimidine-purine steps on this and other templates (**Supplementary Fig. 1b** and data not shown).

**REFERENCES:**

1. Mathews, D. E. & Durbin, R. D. Mechanistic aspects of tagetitoxin inhibition of RNA polymerase from *Escherichia coli*. *Biochemistry* **33**, 11987-92 (1994).
2. Artsimovitch, I., Svetlov, V., Anthony, L., Burgess, R. R. & Landick, R. RNA polymerases from *Bacillus subtilis* and *Escherichia coli* differ in recognition of regulatory signals in vitro. *J Bacteriol* **182**, 6027-35 (2000).
3. Steinberg, T. H. & Burgess, R. R. Tagetitoxin inhibition of RNA polymerase III transcription results from enhanced pausing at discrete sites and is template-dependent. *J Biol Chem* **267**, 20204-11 (1992).
4. Artsimovitch, I. & Landick, R. The transcriptional regulator RfaH stimulates RNA chain synthesis after recruitment to elongation complexes by the exposed nontemplate DNA strand. *Cell* **109**, 193-203 (2002).

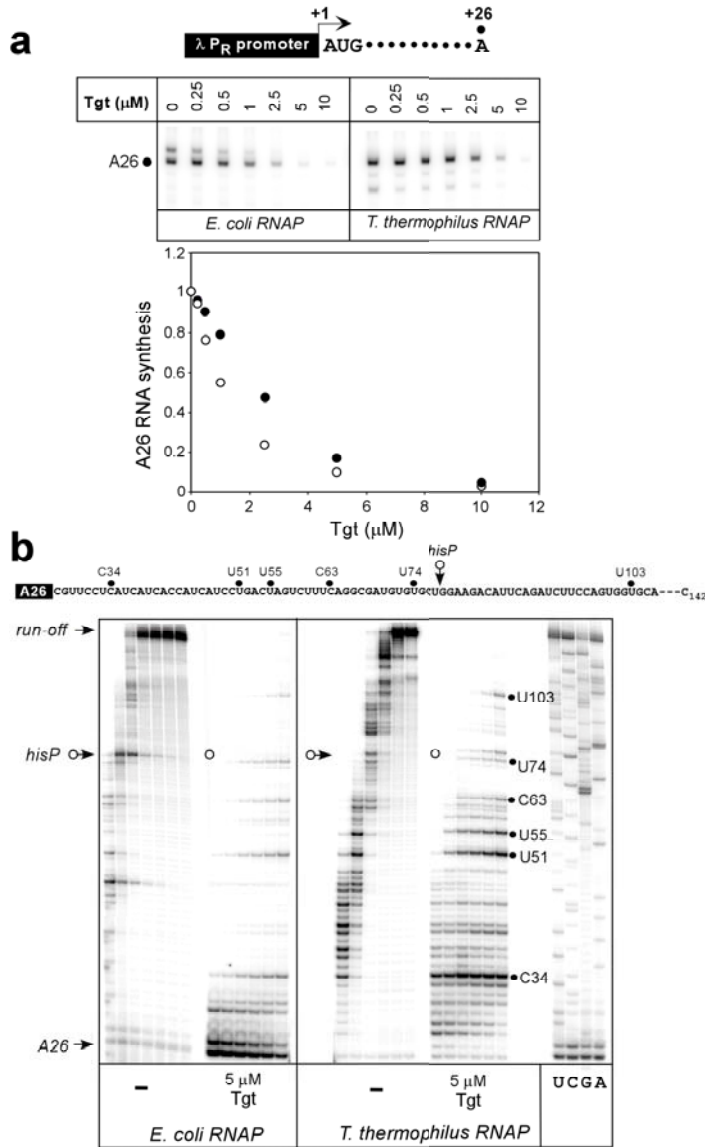

**Vassilyev *et al.*  
Figure 1**

**Supplementary Figure 1** Tgt inhibits transcription by the *E. coli* and *T. thermophilus* RNAPs. **(a)** Effect on halted complex formation on the phage  $\lambda$  P<sub>R</sub> promoter template pIA226<sup>4</sup>. Open complexes were formed by the *E. coli* (○) and *T. thermophilus* (●) RNAPs (at 37 and 55 °C, respectively), and then incubated with increasing concentrations of Tgt and the substrates (ApU, GTP, [ $\alpha$ -<sup>32</sup>P]GTP, ATP and UTP) for 15 min at 37 °C. Samples were quenched and separated on a 10% denaturing gel. The relative amounts of synthesized A26 RNA products are plotted below the gel panel. **(b)** Effect on RNA chain elongation. Halted A26 TECs were formed on pIA226 by the *E. coli* and *T. thermophilus* RNAPs during a 15-min incubation at 37 and 55 °C, respectively, incubated with Tgt (5 μM) for 2

min at 37 °C, and challenged with NTPs (25 μM each) and rifampicin (at 25 μg/ml). Aliquots were withdrawn at 5, 10, 20, 40, 90, and 180 s, quenched with the STOP buffer, and separated on a 10% denaturing gel. Positions of the halted A26 TEC and the run-off transcript are indicated with arrows, the *hisP* pause RNA is indicated by an open circle. *T. thermophilus* RNAP does not recognize the *hisP* and other hairpin-dependent pause sites. Positions of the Tgt-induced pause sites (mapped using chain-termination reactions with 3'-O-Me NTPs) that are common to both bacterial enzymes are shown with bullets.

**Supplementary Figure 2: Comparison with the eukaryotic enzymes**

While eukaryotic pol III RNAP is sensitive to Tgt, pol II requires significantly higher Tgt concentrations for inhibition<sup>1</sup>. The simplest explanation is that pol II RNAPs carry amino acid substitutions that disrupt Tgt binding by either a loss-of-contact or steric hindrance mechanism. However, among the Tgt-binding residues (**Fig. 2**) no substitutions are unique for the pol II enzymes, making this hypothesis unlikely. Alternatively, given the concerted mode of the Tgt binding, one can easily envision how such binding interface would be compromised by mutations that either displace the residues directly involved in Tgt binding or destroy their supporting structural framework. One apparent candidate that may play such a role is a hydrophobic core region adjacent to the Tgt-binding site (in particular, to the  $\beta'$ Gln504 and  $\beta'$ Glu813 residues crucial for the Tgt function; **Supplementary Fig. 1**).

**a**

|        | $\beta$ |                        | $\beta'$ |                        |     |                          |     |                      |  |
|--------|---------|------------------------|----------|------------------------|-----|--------------------------|-----|----------------------|--|
| Eco    | 809     | G Y N <b>F E</b> D S I | 450      | H P L <b>V C</b> A A Y | 501 | V P S <b>Q D</b> V V L G | 626 | Y T G <b>F A</b> Y A |  |
| Tth    | 681     | G Y N <b>F E</b> D A I | 729      | H P L <b>V C</b> E A F | 780 | K P S <b>R D</b> I I L G | 936 | Y Y G <b>F T</b> F S |  |
| Ath    | 665     | G Y N <b>F E</b> D A V | 479      | H P L <b>V C</b> K G F | 530 | V P T <b>Q D</b> M L I G | 34* | T L G <b>F Q</b> Q A |  |
| Sc III | 763     | G Y D <b>I E</b> D A L | 501      | N E <b>C V</b> C T P Y | 552 | A A T <b>Q D</b> F I T G | 699 | K L C <b>A R</b> F L |  |
| Sc II  | 831     | G Y N <b>Q E</b> D S M | 471      | N L <b>S V</b> T S P Y | 522 | G I V <b>Q D</b> T L C G | 651 | K V V <b>N</b> F W L |  |

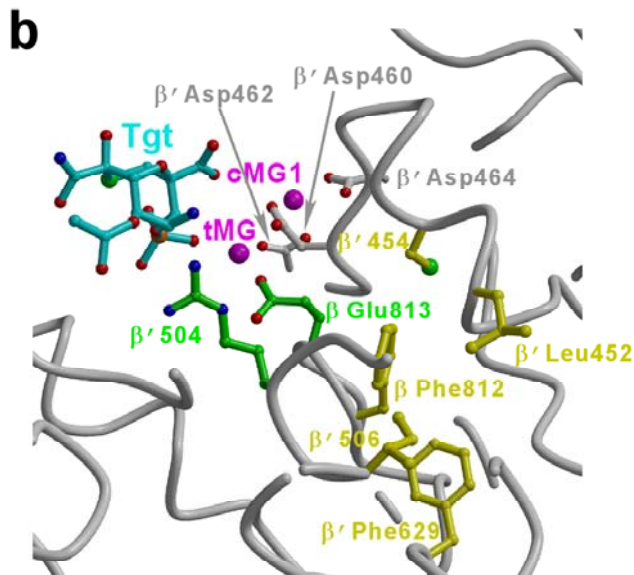

**Supplementary Figure 2.** Hydrophobic core adjacent to the Tgt binding site in bacterial RNAP. **(a)** Sequence alignment shows the RNAP regions flanking the conserved hydrophobic core in bacterial, chloroplast, and eukaryotic pol III RNAPs (yellow boxes) sensitive to Tgt and their polar substitutions in the Tgt-insensitive pol II (red boxes). Two Tgt-binding residues that might be affected by

alterations of the hydrophobic core are highlighted by green boxes. The same species as in **Figure 2** were used for comparison. **(b)** Three-dimensional drawing of the Tgt-binding site shows the two Tgt-binding residues (green balls-and-sticks) in the vicinity to the hydrophobic residues making a local hydrophobic core that might be essential for formation of the Tgt binding site (yellow balls-and-sticks).

While this region is conserved among the bacterial and pol III enzymes, in pol II its conformation is defined by the hydrogen bonds made by the polar side chains substituting the hydrophobic residues observed in bacterial RNAP (**Supplementary Fig. 2a**). This may result in a reduced flexibility of the Tgt-binding site in pol II, thus presumably hindering the induced fit of the inhibitor to RNAP and disturbing this concerted mode of Tgt recognition.

Finally, resistance of pol II to tagetitoxin can arise from different catalytic properties of the enzyme itself (see below). Indeed, marked differences in transcription elongation and termination exist between pol II and pol III; some of these differences were attributed by Chedin and colleagues to the pol III subunit Rpc11, which apparently combines properties of pol II subunit Rpb9 and its transiently associated elongation factor TFIIS<sup>2</sup>. Considering profound differences in sequence and architecture of pol II and pol III, we presently cannot offer a simple explanation for their differential sensitivity to tagetitoxin.

#### REFERENCES:

1. Mathews, D. E. & Durbin, R. D. Tagetitoxin inhibits RNA synthesis directed by RNA polymerases from chloroplasts and *Escherichia coli*. *J Biol Chem* **265**, 493-8 (1990).
2. Chedin, S., Riva, M., Schultz, P., Sentenac, A. & Carles, C. The RNA cleavage activity of RNA polymerase III is mediated by an essential TFIIS-like subunit and is important for transcription termination. *Genes Dev* **12**, 3857-71 (1998).

**Supplementary Figure 3: Tgt acts as an uncompetitive inhibitor.**

Mathews and Durbin<sup>1</sup> suggested that Tgt acts as an uncompetitive inhibitor of transcription at the  $\lambda$  P<sub>R</sub> promoter. However, under certain conditions, mixed inhibition would yield the pattern similar to the uncompetitive inhibition<sup>2</sup>, whereas the location of the Tgt-binding site next to the catalytic center suggests that a partial competition with the incoming substrate could be possible. To evaluate this possibility, we performed steady-state transcription initiation assays on T7A1 promoter and monitored synthesis of the ApUpC RNA from ApU and CTP substrates (**Supplementary Fig. 3**).

**Supplementary Figure 3.**

Tgt acts as an uncompetitive

inhibitor. **(a)** Steady-state abortive initiation assays

were performed on T7A1 promoter template with the wild-type *E. coli* RNAP in the presence of increasing concentrations of Tgt.

Samples were analyzed on a 15% denaturing gel. **(b)**

Double reciprocal plots of inverse reaction velocity as a function of inverse substrate (CTP) concentration; linear fits are shown. **(c)** Intercept of the double reciprocal plot as a function of Tgt

concentration. From these

data,  $K_i$  for Tgt was 5  $\mu$ M. Linear regression analysis was performed with Lotus 1-2-3 (IBM).

**a**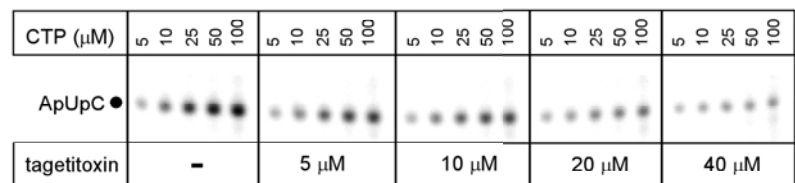**b**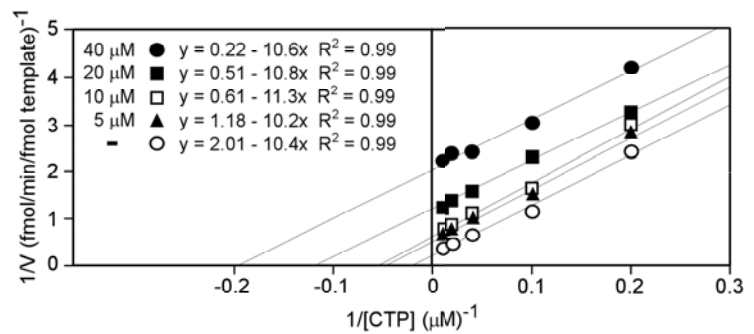**c**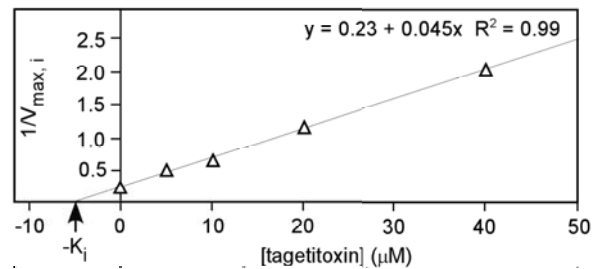

Double reciprocal plots ( $1/V$  vs  $1/S$ ) generated in the presence of different concentration of Tgt were nearly perfectly parallel. Moreover, the intercept replot as a function of inhibitor concentration was linear. This pattern is consistent with the uncompetitive but not with mixed inhibition pattern, as the latter would yield the hyperbolic replot<sup>2</sup>. Thus, in agreement with Mathews and Durbin and in support of the molecular modeling (**Fig. 5**), we conclude that Tgt acts as an uncompetitive inhibitor of RNAP, and does not compete with the incoming substrate NTP.

**REFERENCES:**

1. Mathews, D. E. & Durbin, R. D. Mechanistic aspects of tagetitoxin inhibition of RNA polymerase from *Escherichia coli*. *Biochemistry* **33**, 11987-92 (1994).
2. Segel, I. *Enzyme Kinetics* (Wiley, New York, 1975).

**Supplementary Table 1. Plasmids and oligonucleotides used in this work.**

| Name   | Description                                                                                                                                                               | Source or note |
|--------|---------------------------------------------------------------------------------------------------------------------------------------------------------------------------|----------------|
| pIA171 | T7 A1 promoter transcription template                                                                                                                                     | 1              |
| pIA226 | $\lambda$ P <sub>R</sub> promoter - A26 - <i>his</i> pause transcription template                                                                                         | 2              |
| pIA299 | P <sub>T7</sub> - <i>rpoA-rpoB-rpoC</i>                                                                                                                                   | 3              |
| pIA423 | P <sub>T7</sub> - <i>rpoA-rpoB-rpoC</i> [intein-CBP]                                                                                                                      | 3              |
| pIA434 | P <sub>T7</sub> - <i>rpoA</i> -[His <sub>6</sub> ] <i>rpoB</i> <sup>QP513</sup> - <i>rpoC</i> [intein-CBP] cloned between <i>NcoI</i> and <i>SdaI</i> sites of pIA423     | this work      |
| pIA509 | P <sub>T7</sub> - <i>rpoA-rpoB-rpoC</i> : co-expresses wild-type <i>E. coli</i> $\alpha$ , $\beta$ , and $\beta'$ core RNAP                                               | this work      |
| pIA530 | P <sub>T7</sub> - <i>rpoA-rpoB-rpoC</i> <sup>N458D</sup> [His <sub>6</sub> ]                                                                                              | 4              |
| pIA545 | P <sub>trc</sub> -[His <sub>6</sub> ] <i>rpoB</i> <sup>Mfe1561</sup> : silent <i>MfeI</i> site introduced by site-directed mutagenesis at <i>rpoB</i> codon 561 in pIA160 | 5              |
| pIA611 | P <sub>trc</sub> - <i>rpoC</i> <sup>R731A</sup> [His <sub>6</sub> ]; site-directed mutagenesis in pRL662                                                                  | this work      |
| pIA614 | P <sub>trc</sub> - <i>rpoC</i> <sup>Q504A</sup> [His <sub>6</sub> ]; site-directed mutagenesis in pRL662                                                                  | this work      |
| pIA618 | P <sub>T7</sub> - <i>rpoA-rpoB-rpoC</i> <sup>R731A</sup> [His <sub>6</sub> ]: <i>BsmI-HindIII</i> fragment from pIA611 cloned into pIA299                                 | this work      |
| pIA620 | P <sub>trc</sub> -[His <sub>6</sub> ] <i>rpoB</i> <sup>E813A</sup> ; site-directed mutagenesis in pIA545                                                                  | this work      |
| pIA621 | P <sub>trc</sub> - <i>rpoC</i> <sup>Q504A</sup> [His <sub>6</sub> ]; <i>SnaBI-SphI</i> site from pIA614 recloned into pRL662                                              | this work      |
| pIA622 | P <sub>trc</sub> -[His <sub>6</sub> ] <i>rpoB</i> <sup>S1105A</sup> ; site-directed mutagenesis in pIA545                                                                 | 5              |
| pIA623 | P <sub>T7</sub> - <i>rpoA</i> -[His <sub>6</sub> ] <i>rpoB</i> <sup>S1105A</sup> - <i>rpoC</i> : <i>NcoI-SbfI</i> fragment from pIA622 cloned into pIA509                 | this work      |
| pIA624 | P <sub>T7</sub> - <i>rpoA</i> -[His <sub>6</sub> ] <i>rpoB</i> <sup>E813A</sup> - <i>rpoC</i> : <i>NcoI-SbfI</i> fragment from pIA620 cloned into pIA509                  | this work      |
| pIA664 | P <sub>trc</sub> - <i>rpoB</i> <sup>R678A</sup> [His <sub>6</sub> ]; site-directed mutagenesis in pIA545                                                                  | this work      |
| pRL662 | P <sub>trc</sub> - <i>rpoC</i> -[His <sub>6</sub> ]                                                                                                                       | 6              |

| <b><u>TRANSCRIPTION TEMPLATES</u></b> |                                                |
|---------------------------------------|------------------------------------------------|
| abortive initiation                   | PCR of pIA171 with 14 and 18 (ApUpC synthesis) |
| transcript cleavage and elongation    | PCR of pIA226 with 17 and 18                   |

| <b><u>OLIGONUCLEOTIDES FOR TEMPLATES</u></b> |                           |                                              |
|----------------------------------------------|---------------------------|----------------------------------------------|
| 14                                           | GGAGAGACAACCTTAAAGAGA     | T7A1 upstream                                |
| 17                                           | CGTTAAATCTATCACCGCAAGGG   | $\lambda$ P <sub>R</sub> upstream            |
| 18                                           | GGAAGATGATCTTCCGGGGGCTTTC | T7A1 and $\lambda$ P <sub>R</sub> downstream |

**REFERENCES:**

1. Ederth, J., Artsimovitch, I., Isaksson, L. A. & Landick, R. The downstream DNA jaw of bacterial RNA polymerase facilitates both transcriptional initiation and pausing. *J Biol Chem* **277**, 37456-63 (2002).
2. Artsimovitch, I., Svetlov, V., Anthony, L., Burgess, R. R. & Landick, R. RNA polymerases from *Bacillus subtilis* and *Escherichia coli* differ in recognition of regulatory signals in vitro. *J Bacteriol* **182**, 6027-35 (2000).
3. Artsimovitch, I., Svetlov, V., Murakami, K. S. & Landick, R. Co-overexpression of *Escherichia coli* RNA polymerase subunits allows isolation and analysis of mutant enzymes lacking lineage-specific sequence insertions. *J Biol Chem* **278**, 12344-55 (2003).
4. Svetlov, V., Vassilyev, D. G. & Artsimovitch, I. Discrimination against deoxyribonucleotide substrates by bacterial RNA polymerase. *J Biol Chem* **279**, 38087-90 (2004).
5. Artsimovitch, I., Vassilyeva, M. N., Svetlov, D., Svetlov, V., Perederina, A., Igarashi, N., Matsugaki, N., Wakatsuki, S., Tahirov, T. H. & Vassilyev, D. G. Allosteric modulation of the RNA polymerase catalytic reaction is an essential component of transcription control by rifamycins. *Cell* **122**, 351-63 (2005).
6. Wang, D., Meier, T., Chan, C., Feng, G., Lee, D. & Landick, R. Discontinuous movements of DNA and RNA in *E. coli* RNA polymerase accompany formation of a paused transcription complex. *Cell* **81**, 341-350 (1995).
